# Supplementary material for: The Identification of Structural Changes in the Lithium Hexamethyldisilazide–Toluene System via Ultrasonic Relaxation Spectroscopy and Theoretical Calculations
Source: MDPI journal article supplement (doi:10.3390/molecules29040813), 2024-02-09
Supplement: s1 [file s1]

## Supplementary Information

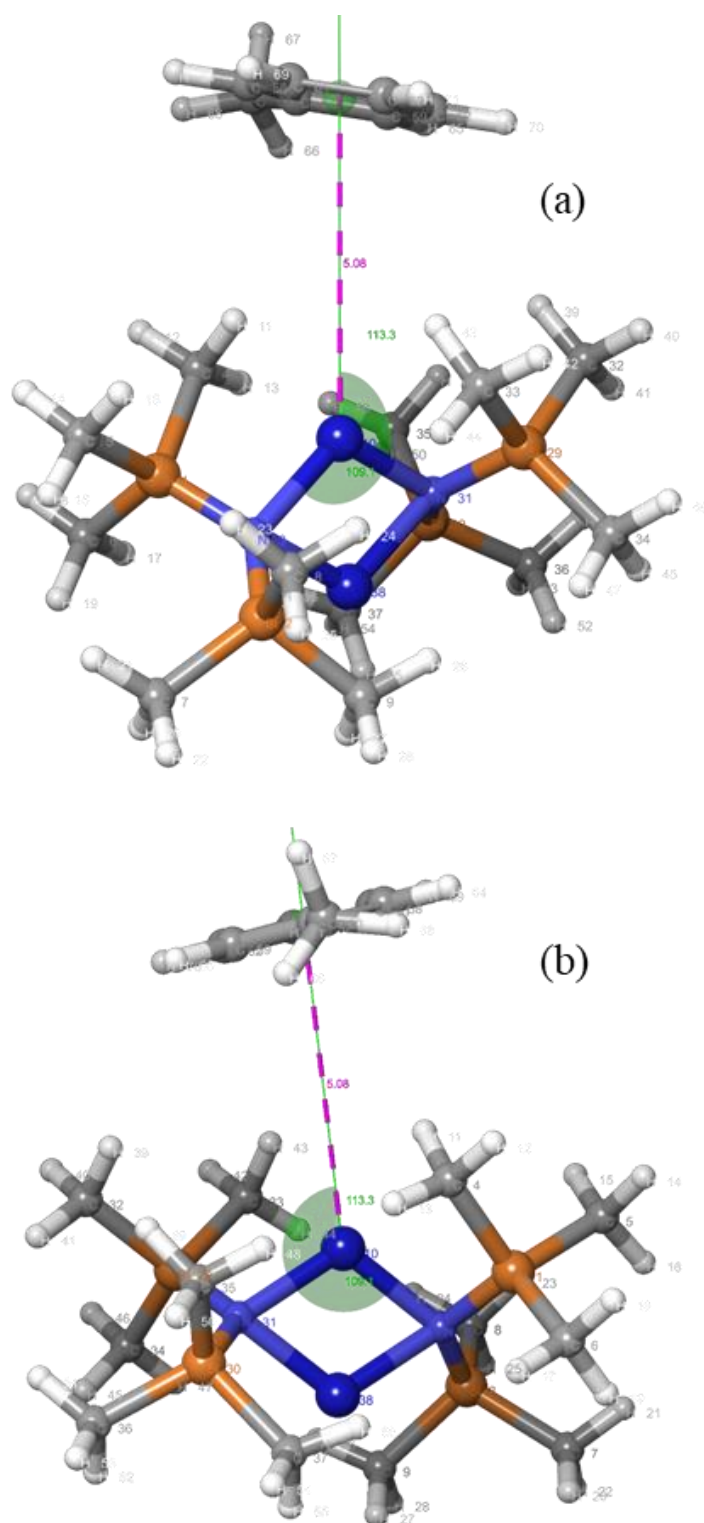

**Figure S1.** LiHMDS-toluene complex. The figure depicts the angles between the N-Li-N ( $109.1^\circ$ ) and the angle of N-Li- $\eta^6$ -toluene ( $113.3^\circ$ ).

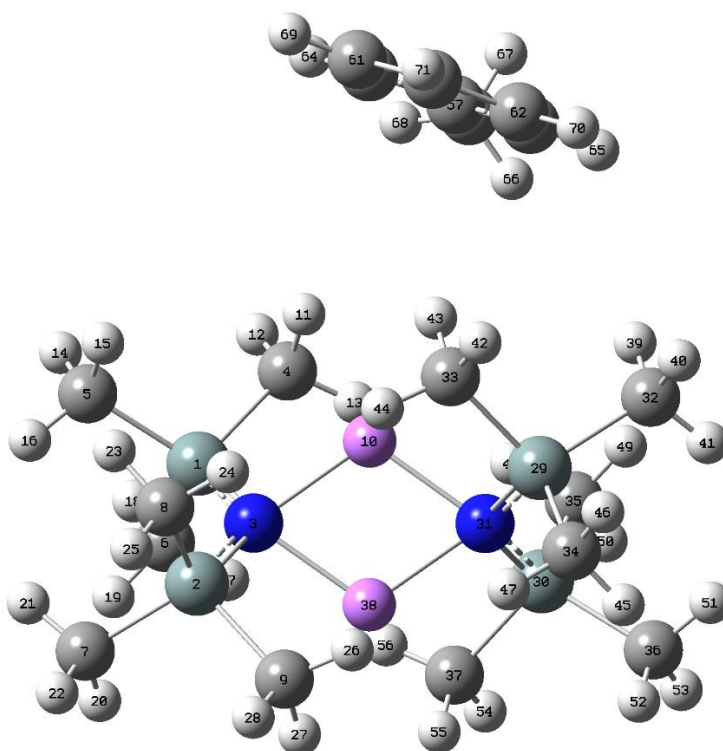

**Figure S2.** The theoretical representation of LiHMDS-toluene complex with labeled atoms for easier identification (see **Table S1**).

**Table S1.** The bond distances and angles of the LiHMDS-toluene complex.

| Tag | Symbol | NA | Bond (Å) | Angle (°) |
|-----|--------|----|----------|-----------|
| 1   | Si     |    |          |           |
| 2   | Si     | 1  | 3.070    |           |
| 3   | N      | 2  | 1.723    | 27.047    |
| 4   | C      | 1  | 1.915    | 107.074   |
| 5   | C      | 1  | 1.896    | 114.968   |
| 6   | C      | 1  | 1.895    | 114.221   |
| 7   | C      | 2  | 1.896    | 92.992    |
| 8   | C      | 2  | 1.894    | 110.527   |
| 9   | C      | 2  | 1.918    | 130.679   |
| 10  | Li     | 3  | 1.991    | 131.051   |
| 11  | H      | 4  | 1.099    | 113.605   |
| 12  | H      | 4  | 1.094    | 109.798   |
| 13  | H      | 4  | 1.097    | 113.498   |
| 14  | H      | 5  | 1.095    | 110.830   |
| 15  | H      | 5  | 1.094    | 111.320   |
| 16  | H      | 5  | 1.093    | 112.123   |
| 17  | H      | 6  | 1.094    | 111.586   |
| 18  | H      | 6  | 1.095    | 111.597   |
| 19  | H      | 6  | 1.094    | 110.945   |

|    |    |    |       |         |
|----|----|----|-------|---------|
| 20 | H  | 7  | 1.094 | 111.442 |
| 21 | H  | 7  | 1.093 | 112.075 |
| 22 | H  | 7  | 1.095 | 110.776 |
| 23 | H  | 8  | 1.094 | 110.779 |
| 24 | H  | 8  | 1.094 | 111.691 |
| 25 | H  | 8  | 1.095 | 111.620 |
| 26 | H  | 9  | 1.097 | 113.701 |
| 27 | H  | 9  | 1.099 | 112.876 |
| 28 | H  | 9  | 1.093 | 109.992 |
| 29 | Si | 10 | 2.765 | 128.725 |
| 30 | Si | 29 | 3.075 | 70.004  |
| 31 | N  | 30 | 1.722 | 26.858  |
| 32 | C  | 29 | 1.896 | 121.368 |
| 33 | C  | 29 | 1.914 | 61.808  |
| 34 | C  | 29 | 1.895 | 131.058 |
| 35 | C  | 30 | 1.894 | 110.673 |
| 36 | C  | 30 | 1.896 | 93.039  |
| 37 | C  | 30 | 1.917 | 130.397 |
| 38 | Li | 31 | 1.980 | 95.759  |
| 39 | H  | 32 | 1.094 | 111.008 |
| 40 | H  | 32 | 1.095 | 110.916 |
| 41 | H  | 32 | 1.093 | 112.178 |
| 42 | H  | 33 | 1.094 | 109.953 |
| 43 | H  | 33 | 1.099 | 112.973 |
| 44 | H  | 33 | 1.096 | 113.438 |
| 45 | H  | 34 | 1.094 | 110.986 |
| 46 | H  | 34 | 1.095 | 111.524 |
| 47 | H  | 34 | 1.094 | 111.648 |
| 48 | H  | 35 | 1.094 | 111.629 |
| 49 | H  | 35 | 1.094 | 110.730 |
| 50 | H  | 35 | 1.095 | 111.683 |
| 51 | H  | 36 | 1.093 | 112.112 |
| 52 | H  | 36 | 1.094 | 111.446 |
| 53 | H  | 36 | 1.095 | 110.743 |
| 54 | H  | 37 | 1.093 | 110.146 |
| 55 | H  | 37 | 1.099 | 112.705 |
| 56 | H  | 37 | 1.097 | 113.648 |
| 57 | C  | 4  | 4.429 | 160.902 |
| 58 | C  | 57 | 1.398 | 77.402  |
| 59 | C  | 57 | 1.399 | 100.101 |
| 60 | C  | 57 | 1.509 | 93.471  |
| 61 | C  | 58 | 1.394 | 121.050 |
| 62 | C  | 59 | 1.392 | 121.038 |
| 63 | C  | 61 | 1.393 | 120.173 |
| 64 | H  | 58 | 1.085 | 119.370 |
| 65 | H  | 59 | 1.085 | 119.391 |
| 66 | H  | 60 | 1.092 | 111.307 |
| 67 | H  | 60 | 1.095 | 111.012 |
| 68 | H  | 60 | 1.091 | 111.413 |
| 69 | H  | 61 | 1.084 | 119.750 |

|    |   |    |       |         |
|----|---|----|-------|---------|
| 70 | H | 62 | 1.084 | 119.751 |
| 71 | H | 63 | 1.083 | 120.322 |
